# Supplementary material
Source: MDPI journal article supplement (https://www.mdpi.com/2624-5558/4/3/20)
Supplement: s1 [file s1]

Table S3: Summary of ONEWAY ANOVA post-hoc tests of reactors according to fuel additions.

R7, R8: no-fuel. R1, R2: petro F76. R3, R4: FT-F76. R5, R6: fuel mix. Dependent variables: relative abundance of the 100 genera in highest relative abundance. Avg: mean value. STDEV: standard deviation. Post-hoc tests: significance level < 0.05%, Tukey HSD and Dunnett t (2-sided) where no-fuel is the control group. Homogeneous groups are designated by the same letters (A, B, C). \*: significant for Dunnett but not for Tukey HSD.

| <b>Reactors</b>                                                                      | <b>no fuel</b><br>Avg<br>(STDEV) | <b>petro-F76</b><br>Avg<br>(STDEV) | <b>FT-F76</b><br>Avg<br>(STDEV) | <b>fuel mix</b><br>Avg<br>(STDEV) |
|--------------------------------------------------------------------------------------|----------------------------------|------------------------------------|---------------------------------|-----------------------------------|
| <b>Class: genus</b>                                                                  |                                  |                                    |                                 |                                   |
| <b>Bacteroidia:</b><br><i>Bacteroidetes</i> BD-2<br>Homogeneous groups               | 5.4 (0.877)<br><b>A</b>          | 0.27 (0.382)<br><b>B</b>           | 0.36 (0.515)<br><b>B</b>        | 0.09 (0.133)<br><b>B</b>          |
| <b>Campylobacteria:</b><br><i>Sulfurovum</i><br>Homogeneous groups                   | 0.02 (0.022)<br><b>A</b>         | 0.29 (0.090)<br><b>BC</b>          | 0.05 (0.066)<br><b>C</b>        | 0.11 (0.066)<br><b>C</b>          |
| <b>Chloroflexia:</b> JG30-KF-CM45 (Family)<br>Homogeneous groups                     | 0.06 (0.000)<br><b>A</b>         | 0.3 (0.022)<br><b>B</b>            | 0.03 (0.000)<br><b>A</b>        | 0.05 (0.067)<br><b>A</b>          |
| <b>Desulfobacteria:</b><br><i>Desulfospira</i><br>Homogeneous groups                 | 2.07 (0.492)<br><b>A</b>         | 0.00 (0.000)<br><b>B</b>           | 0.45 (0.640)<br><b>B</b>        | 0.00 (0.000)<br><b>B</b>          |
| <b>Desulfobacteria:</b><br><i>Desulfonatronobacter</i><br>Homogeneous groups         | 0.00 (0.000)<br><b>A</b>         | 0.84 (0.246)<br><b>B</b>           | 0.11 (0.068)<br><b>AB</b>       | 0.22 (0.310)<br><b>AB</b>         |
| <b>Desulfobacteria:</b><br>Desulfosarcinaceae (Family)<br>Homogeneous groups         | 0.31 (0.174)<br><b>A</b>         | 1.29 (0.293)<br><b>B</b>           | 0.33 (0.070)<br><b>A</b>        | 0.53 (0.089)<br><b>A</b>          |
| <b>Desulfobulbia:</b> MSBL7 (Family)<br>Desulfurivibrionaceae)<br>Homogeneous groups | 0.00 (0.000)<br><b>A</b>         | 0.19 (0.045)<br><b>B</b>           | 0.00 (0.000)<br><b>A</b>        | 0.03 (0.044)<br><b>A</b>          |
| <b>Clostridia:</b><br><i>Dethiosulfatibacter</i><br>Homogeneous groups               | 0.00 (0.000)<br><b>A</b>         | 0.11 (0.023)<br><b>B</b>           | 0.00 (0.000)<br><b>A</b>        | 0.03 (0.044)<br><b>A</b>          |
| <b>Firmicutes: unclassified</b><br>Homogeneous groups                                | 0.00 (0.000)<br><b>A</b>         | 0.3 (0.023)<br><b>B</b>            | 0.03 (0.045)<br><b>A</b>        | 0.09 (0.044)<br><b>B</b>          |

|                                                                    |                           |                            |                               |                          |
|--------------------------------------------------------------------|---------------------------|----------------------------|-------------------------------|--------------------------|
| Alphaproteobacteria:<br><i>Hyphomonas</i><br>Homogeneous groups    | 0.44 (0.488)<br><b>A</b>  | 0.14 (0.112)<br><b>A</b>   | 2.11 (0.069)<br><b>B</b>      | 0.41 (0.266)<br><b>A</b> |
| Alphaproteobacteria:<br><i>Paracoccus</i><br>Homogeneous groups    | 0.17 (0.241)<br><b>A*</b> | 1.72 (0.091)<br><b>A</b>   | 0.21 (0.157)<br><b>A</b>      | 0.72 (0.754)<br><b>A</b> |
| Alphaproteobacteria:<br><i>Magnetovibrio</i><br>Homogeneous groups | 47.8 (2.473)<br><b>A</b>  | 2.49 (0.694)<br><b>B</b>   | 12.48<br>(13.539)<br><b>B</b> | 1.62 (0.509)<br><b>B</b> |
| Alphaproteobacteria:<br><i>Erythrobacter</i><br>Homogeneous groups | 2.7 (1.144)<br><b>A</b>   | 0.51 (0.044)<br><b>AB*</b> | 0.13 (0.088)<br><b>B</b>      | 0.24 (0.111)<br><b>B</b> |
