# Supplementary material
Source: MDPI journal article supplement (https://www.mdpi.com/2624-5558/4/3/20)
Supplement: s1 [file s1]

**Table S1.** Alpha diversity measurements for 16S rRNA amplicon libraries after rarefaction. Rarefied to 3338.

| <b>Sample</b> | <b>Number of<br/>Reads before<br/>rarefaction</b> | <b>Species<br/>richness (q=0)</b> | <b>Exponential<br/>Shannon (q=1)</b> | <b>Inverse<br/>Simpson (q=2)</b> |
|---------------|---------------------------------------------------|-----------------------------------|--------------------------------------|----------------------------------|
| SW1           | 26355                                             | 326                               | 117                                  | 49.7                             |
| SW2           | 22789                                             | 247                               | 87.7                                 | 39.3                             |
| R1            | 8802                                              | 184                               | 93.8                                 | 51.1                             |
| R2            | 59354                                             | 258                               | 72                                   | 20.5                             |
| R3            | 26553                                             | 138                               | 28.7                                 | 9.8                              |
| R4            | 19111                                             | 188                               | 49.6                                 | 16.9                             |
| R5            | 22373                                             | 185                               | 36.4                                 | 9.7                              |
| R6            | 17448                                             | 143                               | 43.3                                 | 17.3                             |
| R7            | 26006                                             | 152                               | 23.4                                 | 6                                |
| R8            | 22534                                             | 142                               | 19.9                                 | 5                                |
