# Supplementary material
Source: MDPI journal article supplement (https://www.mdpi.com/2624-5558/4/3/20)
Supplement: s1 [file s1]

**Table S2.** Sulfate Reduction Activity. The average of triplicate samples is shown in units of  $\mu\text{mol S/mL/day}$ . Samples with SRA significantly above baseline values are shown in bold. R1, R2: petro F76; R3, R4: FT-F76; R5, R6: 1:1 mix of petro- and FT-F76; R7, R8: no added fuel. SRA value of the original seawater used for filling the reactors (Day 0) was  $0.032 \mu\text{mol S/mL/day}$  (average of 5 replicates).

|                      | Time (days) |        |             |       |       |       |
|----------------------|-------------|--------|-------------|-------|-------|-------|
|                      | 24          | 53     | 83          | 172   | 239   | 400   |
| <b>R1: petro-F76</b> | 0.029       | 0.019  | 0.032       | 0.023 | 0.025 | 0.033 |
| <b>R2: petro-F76</b> | 0.0351      | 0.019  | 0.037       | 0.022 | 0.021 | 0.044 |
| <b>R3: FT-F76</b>    | 0.044       | 0.0145 | 0.032       | 0.022 | 0.018 | 0.035 |
| <b>R4: FT-F76</b>    | 0.036       | 0.016  | 0.035       | 0.02  | 0.019 | 0.029 |
| <b>R5: fuel mix</b>  | 0.029       | 0.016  | 0.0275      | 0.02  | 0.025 | 0.038 |
| <b>R6: fuel mix</b>  | 0.036       | 0.033  | <b>0.18</b> | 0.02  | 0.024 | 0.073 |
| <b>R7: no fuel</b>   | 0.053       | 0.039  | 0.038       | 0.03  | 0.016 | 0.031 |
| <b>R8: no fuel</b>   | 0.034       | 0.029  | 0.035       | 0.03  | 0.018 | 0.042 |
